# Supplementary material for: Plasma Malondialdehyde and Risk of New-Onset Diabetes after Transplantation in Renal Transplant Recipients: A Prospective Cohort Study
Source: MDPI journal article supplement (doi:10.3390/jcm8040453), 2019-04-04
Supplement: s1 [file s1]

**Supplemental Table S1.** Plasma MDA concentration and all-cause mortality in RTR ( $n = 516$ ).

| <b>All-cause mortality</b> | <b>HR (95% CI) per SD</b> | <b><i>p</i></b> |
|----------------------------|---------------------------|-----------------|
| Crude model                | 0.96 (0.73–1.25)          | 0.74            |
| Model 1                    | 0.97 (0.72–1.29)          | 0.81            |
| Model 2                    | 0.94 (0.70–1.26)          | 0.67            |
| Model 3                    | 0.93 (0.69–1.25)          | 0.62            |
| Model 4                    | 0.98 (0.72–1.32)          | 0.88            |
| Model 5                    | 0.96 (0.71–1.30)          | 0.80            |
| Model 6                    | 0.97 (0.71–1.30)          | 0.81            |

In total 86 (17%) RTR died. Model 1: crude model plus adjustment for demographic and anthropometric characteristics. Model 2: model 1 plus adjustment for metabolism-related variables. Model 3: model 2 plus adjustment for lifestyle characteristics. Model 4: model 3 plus adjustment for transplantation-related data. Model 5: model 4 plus adjustment for immunosuppressive therapy. Model 6: model 5 plus adjustment for inflammation.

**Supplemental Table S2.** Plasma MDA concentration and cardiovascular mortality in RTR ( $n = 516$ ).

| <b>Cardiovascular mortality</b> | <b>HR (95% CI) per SD</b> | <b><i>p</i></b> |
|---------------------------------|---------------------------|-----------------|
| Crude model                     | 0.69 (0.38–1.24)          | 0.21            |
| Model 1                         | 0.70 (0.38–1.31)          | 0.27            |
| Model 2                         | 0.64 (0.33–1.24)          | 0.18            |
| Model 3                         | 0.63 (0.32–1.24)          | 0.18            |
| Model 4                         | 0.65 (0.33–1.31)          | 0.23            |
| Model 5                         | 0.63 (0.31–1.27)          | 0.19            |
| Model 6                         | 0.62 (0.30–1.28)          | 0.20            |

In total 29 (6%) RTR died from a cardiovascular cause. Model 1: crude model plus adjustment for demographic and anthropometric characteristics. Model 2: model 1 plus adjustment for metabolism-related variables. Model 3: model 2 plus adjustment for lifestyle characteristics. Model 4: model 3 plus adjustment for transplantation-related data. Model 5: model 4 plus adjustment for immunosuppressive therapy. Model 6: model 5 plus adjustment for inflammation.

**Supplemental Table S3.** Plasma MDA concentration and dead-censored graft failure in RTR ( $n = 516$ ).

| <b>Graft failure</b> | <b>HR (95% CI) per SD</b> | <b><i>p</i></b> |
|----------------------|---------------------------|-----------------|
| Crude model          | 0.89 (0.65–1.23)          | 0.49            |
| Model 1              | 0.90 (0.66–1.23)          | 0.50            |
| Model 2              | 0.86 (0.62–1.19)          | 0.36            |
| Model 3              | 0.83 (0.60–1.16)          | 0.28            |
| Model 4              | 0.93 (0.68–1.28)          | 0.66            |
| Model 5              | 0.94 (0.69–1.29)          | 0.71            |
| Model 6              | 0.94 (0.69–1.29)          | 0.71            |

In total 57 (11%) RTR developed graft failure. Model 1: crude model plus adjustment for demographic and anthropometric characteristics. Model 2: model 1 plus adjustment for metabolism-related variables. Model 3: model 2 plus adjustment for lifestyle characteristics. Model 4: model 3 plus adjustment for transplantation-related data. Model 5: model 4 plus adjustment for immunosuppressive therapy. Model 6: model 5 plus adjustment for inflammation.
